# Supplementary material for: A series of two-dimensional carbon allotropes with Dirac cone structure
Source: Royal Society of Chemistry journal article supplement (doi:10.1039/d3cp01293j), 2023-01-01
Supplement: d3cp01293j1.pdf [file d3cp01293j1.pdf]

# Supporting Information for A Series of Two-dimensional Carbon Allotropes with Dirac Cone

Guo Xiang Wang<sup>1</sup>

<sup>1</sup>School of Science, Henan Institute of Technology, XinXiang,  
453003, China

May 6, 2023

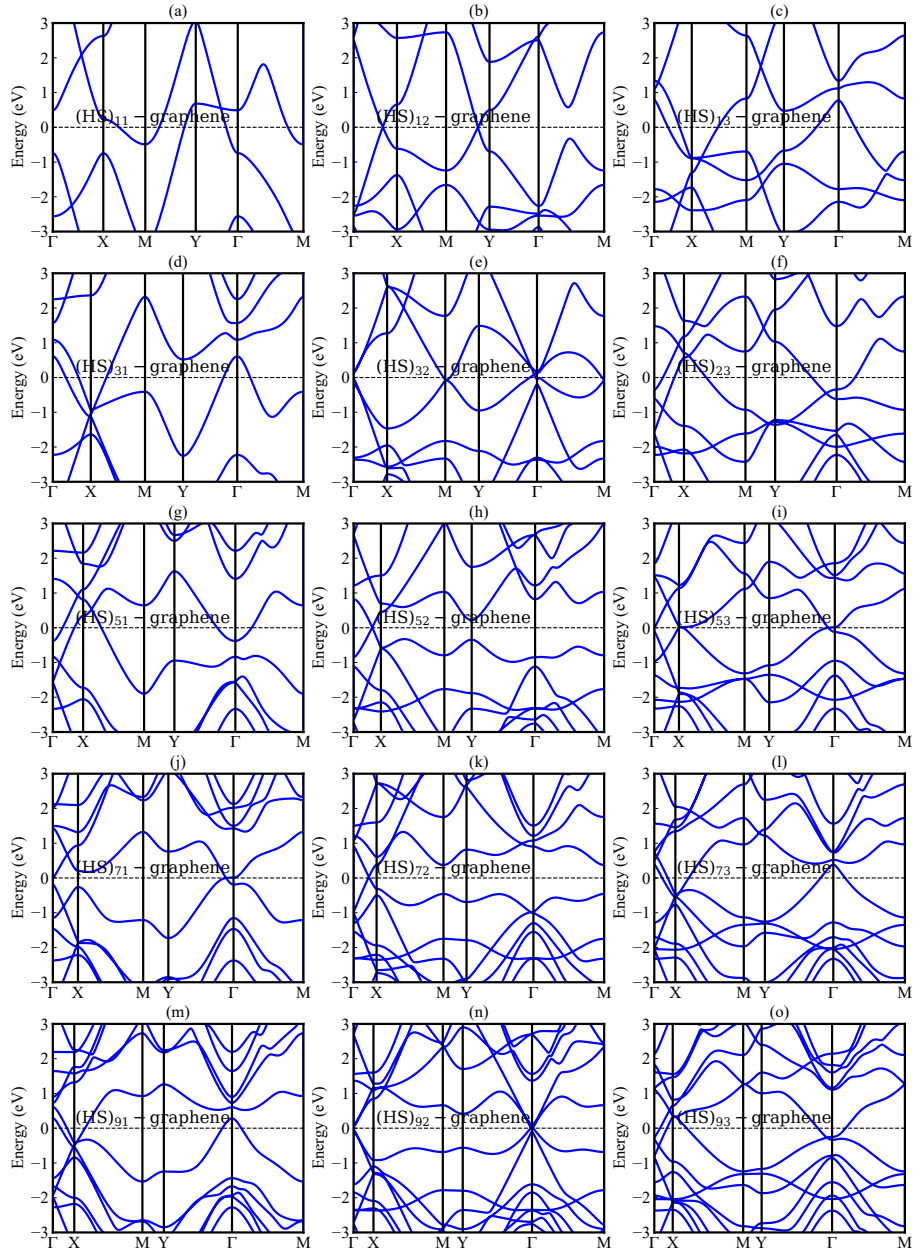

Fig.S1 The band structures of  $(\text{HS})_{nm}$ -graphene with odd number  $n$ .

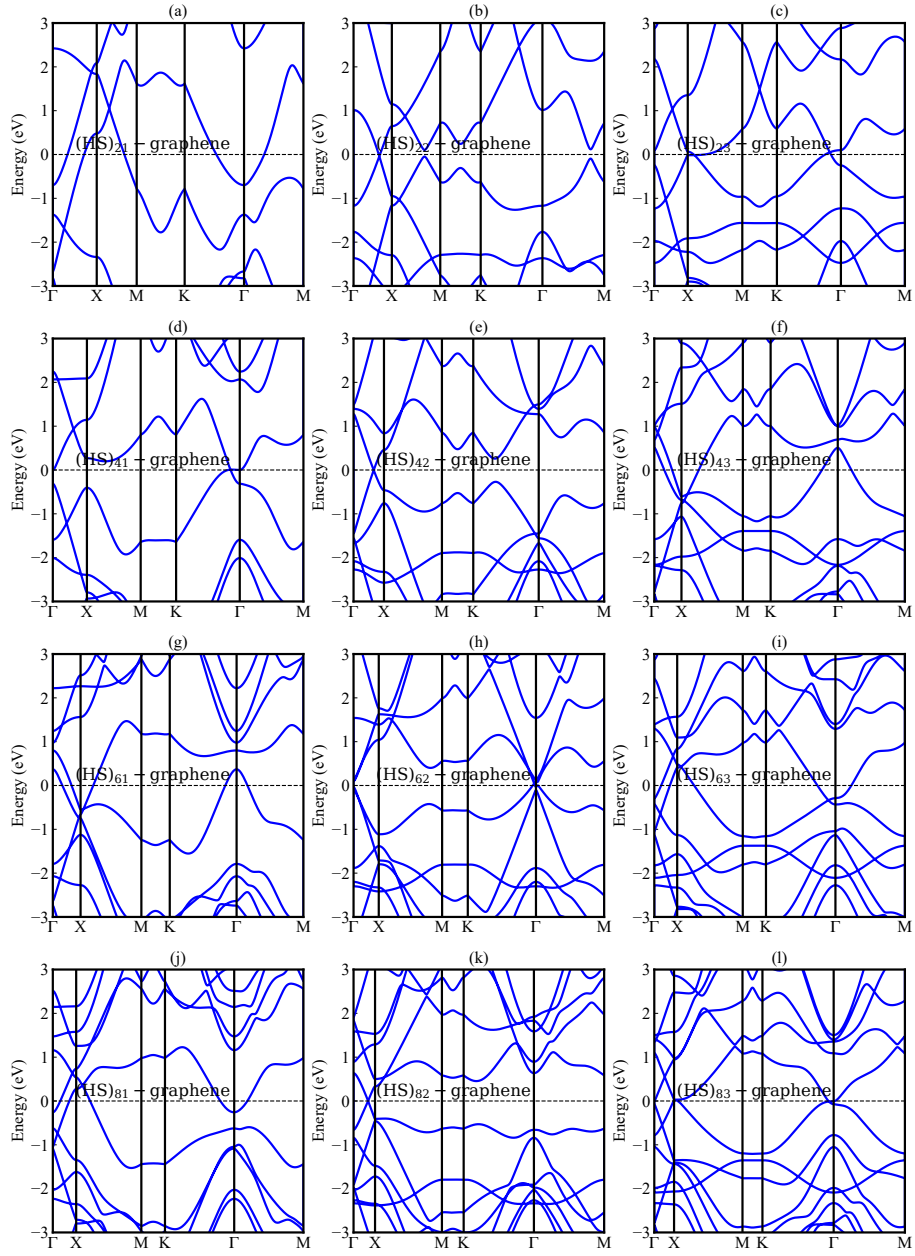

Fig.S2 The band structures of  $(\text{HS})_{nm}$ -graphene with even number  $n$ .

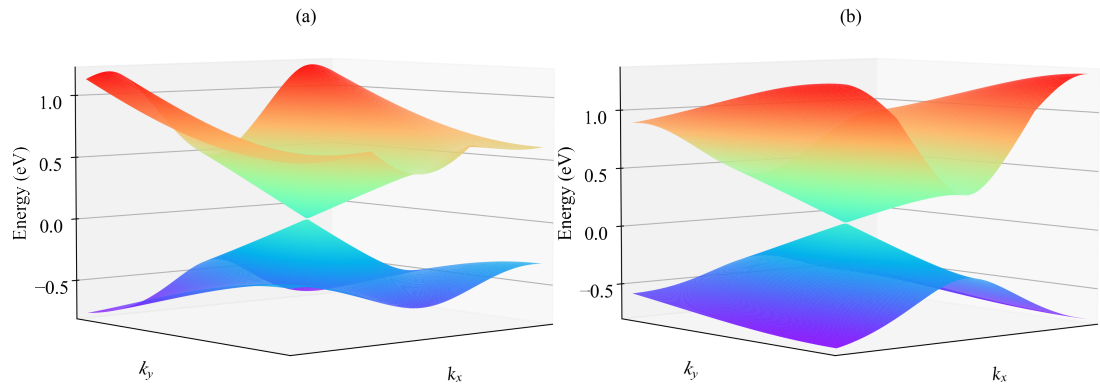

Fig.S3 The three-dimensional band structures of (a)  $(\text{HS})_{52}$ -graphene and (b)  $(\text{HS})_{nm}$ -graphene around the Dirac point  $D_1$ .

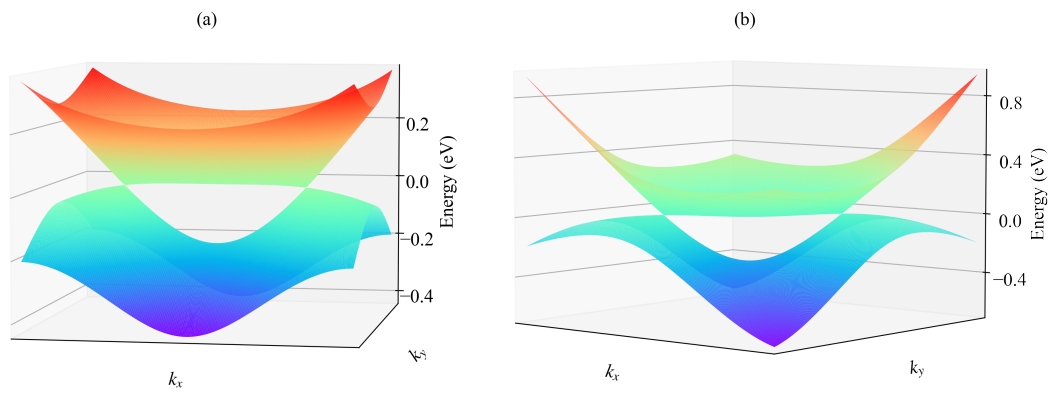

Fig.S4 The three-dimensional band structures of (a)  $(\text{HS})_{71}$ -graphene and (b)  $(\text{HS})_{41}$ -graphene around the Dirac points  $D_1$  and  $D_2$ .

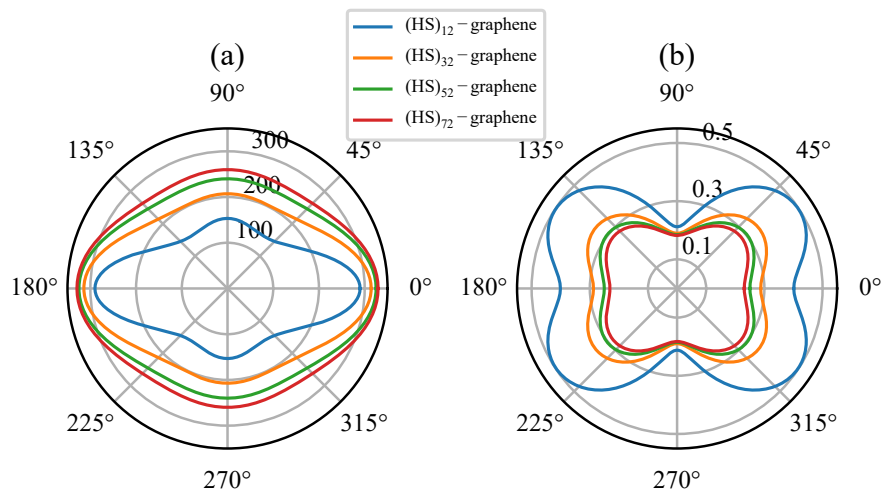

Fig.S5 The orientation-dependence of (a) Young's modulus and (b) Poisson's ratio of  $(HS)_{12}$ -graphene,  $(HS)_{32}$ -graphene,  $(HS)_{52}$ -graphene and  $(HS)_{72}$ -graphene.
